1 **Joint interactions with humans may pose a higher risk of zoonotic outbreaks than**  
2 **interactions with conspecifics among wildlife populations at human-wildlife interfaces**

3  
4 Krishna N. Balasubramaniam<sup>1</sup>, Nalina Aiempichitkijkarn<sup>2</sup>, Stefano S. K. Kaburu<sup>3</sup>, Pascal R.  
5 Marty<sup>1,4</sup>, Brianne A. Beisner<sup>1,5</sup>, Eliza Bliss-Moreau<sup>6,7</sup>, Malgorzata E. Arlet<sup>8</sup>, Edward Atwill<sup>1</sup>, &  
6 Brenda McCowan<sup>1,7</sup>

7  
8 <sup>1</sup>Department of Population Health & Reproduction, School of Veterinary Medicine (SVM),  
9 University of California at Davis, Davis CA 95616, USA

10  
11 <sup>2</sup>Animal Behavior Graduate Group, University of California at Davis, Davis CA 95616, USA

12  
13 <sup>3</sup>Department of Biomedical Science and Physiology, Faculty of Science and Engineering,  
14 University of Wolverhampton, Wolverhampton WV1 1LY, UK

15  
16 <sup>4</sup>Zoo Zürich, Zürichbergstrasse 221, 8044 Zürich

17  
18 <sup>5</sup>Animal Resources Division, Yerkes National Primate Research Center, Emory University,  
19 Atlanta GA 30329, USA

20  
21 <sup>6</sup>Department of Psychology, University of California, Davis CA 95616, USA

22  
23 <sup>7</sup>California National Primate Research Center, University of California, Davis CA 95616, USA

24  
25 <sup>8</sup>Institute of Human Biology and Evolution, Faculty of Biology, Adam Mickiewicz University,  
26 61614 Poznan, Poland

27  
28  
29  
30  
31  
32  
33  
34  
35  
36  
37 **Contact information of corresponding author:**

38  
39 Dr. Krishna N. Balasubramaniam  
40 University of California, Davis  
41 One Shields Avenue  
42 Davis CA 95616  
43 USA  
44 Email: [krishnanatarajan@ucdavis.edu](mailto:krishnanatarajan@ucdavis.edu)

45 **Abstract:**

- 46       **1.** Pandemics caused by wildlife-origin pathogens, like COVID-19, highlight the  
47           importance of understanding the ecology of zoonotic transmission and outbreaks among  
48           wildlife populations at human-wildlife interfaces. To-date, the relative effects of human-  
49           wildlife and wildlife-wildlife interactions on the likelihood of such outbreaks remain  
50           unclear.
- 51       **2.** In this study, we used social network analysis and epidemiological Susceptible Infected  
52           Recovered (SIR) models, to track zoonotic outbreaks through wild animals' joint  
53           propensities to engage in social-ecological co-interactions with humans, and their social  
54           grooming interactions with conspecifics.
- 55       **3.** We collected behavioral and demographic data on 10 groups of macaques (*Macaca* spp.)  
56           living in (peri)urban environments across Asia. Outbreak sizes predicted by the SIR  
57           models were related to structural features of the social networks, and particular properties  
58           of individual animals' connectivity within those networks.
- 59       **4.** Outbreak sizes were larger when the first-infected animal was highly central, in both  
60           types of networks. Across host-species, particularly for rhesus and bonnet macaques, the  
61           effects of network centrality on outbreak sizes were stronger through macaques' human  
62           co-interaction networks compared to grooming networks.
- 63       **5.** Our findings, independent of pathogen-transmissibility, suggest that wildlife populations  
64           in the Anthropocene are vulnerable to zoonosis more so due to their propensities to  
65           aggregate around anthropogenic factors than their gregariousness with conspecifics.  
66           Thus, the costs of zoonotic outbreaks may outweigh the potential/perceived benefits of  
67           jointly interacting with humans to procure anthropogenic food. From One Health

68 perspectives, animals that consistently interact with both humans and conspecifics across  
69 time and space are useful targets for disease spillover assessments and control.

70

71 **Keywords:**

72 Human-wildlife interactions, behavioral ecology, social network analysis, pathogen transmission,  
73 zoonotic outbreaks, Susceptible-Infected-Recovered (SIR) models, nonhuman primates

74

75 **Introduction:**

76 The COVID-19 pandemic has highlighted the importance of understanding infectious  
77 disease transmission among wildlife populations at human-wildlife interfaces (HWIs) (Gryseels et  
78 al. 2020; Townsend et al. 2020). Global population expansion has increased spatial overlap and  
79 contact rates between humans and wildlife (Dickman 2013; Nyhus 2016). The resultant HWIs  
80 are now widely recognized as ‘hotspots’ for the transmission and cross-species spillover of  
81 (anthropo)zoonotic (humans to wildlife, and vice-versa) infectious diseases (Cunningham 2017;  
82 Daszak et al. 2000). Despite this widespread recognition, there exists little quantitative,  
83 comparative research that unravels the *pathways* through which infectious agents may enter into  
84 and spread through wildlife populations at these locations. From an evolutionary perspective,  
85 such assessments can provide insights into how infectious disease risk influences, and is in-turn  
86 influenced by, (mal)adaptive responses in wildlife socioecology, behavioral flexibility, and risk-  
87 taking (McCabe et al. 2014; Silk et al. 2019). From a conservation and public health perspective,  
88 such assessments are critical to identify “edge” wildlife, that is individual animals or species  
89 ranging at HWIs which may transmit infectious agents into other wildlife and overlapping  
90 humans (Craft 2015; Engel & Jones-Engel 2011).

91           Research on disease transmission among wildlife populations at HWIs can be hampered  
92 by conceptual and methodological limitations. Traditional research on wildlife populations  
93 assumed that the probability of acquiring an infectious agent is equal across individuals within a  
94 defined area or cohort (Anderson & May 1992). In reality, wild animals at HWIs may interact  
95 with both other animals and humans, may do so to different extents across individuals, time, and  
96 space, and may form patterns of associations through such interactions that could influence  
97 zoonotic agent transmission. Social Network Analysis (SNA), through promising quantitative  
98 ways to evaluate animals' tendencies to interact differently with different socio-ecological  
99 aspects of their environment (e.g., their conspecifics, other overlapping species including  
100 humans), offer exciting avenues to capture such associations and their impact on disease  
101 transmission (Drewe & Perkins 2015; Godfrey 2013; Silk et al. 2019). To-date, however,  
102 epidemiological studies that have implemented SNA have largely focused on animal-animal  
103 interactions, and often on single behavioral features that define such interactions (reviewed  
104 below). Some examples of wildlife-wildlife social networks that have been associated with  
105 increased risk of infectious agent transmission include shared use of space (e.g. Gidgee skinks,  
106 *Egernia stokesii*: Godfrey et al. 2009), contact associations (e.g., giraffes, *Giraffa*  
107 *camelopardalis*: VanderWaal et al. 2014a), aggression (e.g., meerkats, *Suricata suricatta*: Drewe  
108 2010), and social grooming (e.g., Japanese macaques, *Macaca fuscata*: MacIntosh et al. 2012).  
109 Yet disease transmission among wildlife at HWIs may be driven by such multiple, potentially  
110 interplaying types of interactions, including inter-individual differences in animals' interactions  
111 with conspecifics, humans, and anthropogenic features like contaminated water, soil, human  
112 foods, livestock, and other feral mammals (Balasubramaniam et al. 2020a; Bradley & Altizer  
113 2007; Craft 2015). Among anthropogenically-impacted wildlife populations, it is therefore

114 crucial to assess the relative effects of multiple (rather than single or specific types of)  
115 interactions – e.g. social interactions with conspecifics, co-occurrence or joint interactions with  
116 humans or other anthropogenic factors – on the risk of zoonotic transmission and resultant  
117 outbreaks.

118         Mathematical models offer critical insights into the occurrence of real-world  
119 epidemiological processes (Epstein & Axtell 1996). In this regard, network approaches have  
120 been extensively combined with bottom-up, compartmental ‘Susceptible Infected Recovered  
121 (SIR)’ models, that simulate disease spread by causing entities, which may be humans or other  
122 animals, to move across ‘susceptible’, ‘infected’, and ‘recovered’ disease states (Bansal et al.  
123 2007; Brauer 2008). They do so at dynamic probabilities that, based on user specifications of  
124 model complexity, may depend on a combination of one or more pathogen-specific  
125 epidemiological variables (e.g., transmissibility, basic reproduction number: defined below), host  
126 contact patterns (e.g., spatial or social network connectedness), and host attributes (e.g., age-sex  
127 class) or intrinsic states (e.g., physiology, rates of recovery). To date, studies that have  
128 implemented SIR models in combination with wildlife spatial and social networks have revealed  
129 strong associations between network connectedness of the first-infected individual and simulated  
130 disease outcomes, such as pathogen extinction times (i.e. when all individuals have recovered  
131 from the disease and no more individuals can be infected) and outbreak sizes (mean % of  
132 infected individuals) (Carne et al. 2017; Rushmore et al. 2014; Sah et al. 2018). To-date, these  
133 models are yet to be implemented in the context of understanding the relative effects of  
134 anthropogenic factors and social behavior on the risk of zoonotic outbreaks in wildlife  
135 populations.

136 Human-nonhuman primate interfaces are well-suited to address the above gaps. Beyond  
137 sharing close evolutionary histories with humans (Hasegawa et al. 1985), several nonhuman  
138 primate (hereafter NHP) taxa have shared ecological niche space with humans for long periods  
139 of their evolutionary history (e.g., Chacma baboons, *Papio ursinus*, macaques, *Macaca* spp.), or  
140 following relatively recent exposure to human activities like ecotourism and habitat  
141 encroachment (e.g., chimpanzees, *Pan troglodytes*; mountain gorillas, *Gorilla gorilla beringei*)  
142 (reviewed in Fuentes & Hockings 2010; Lappan et al. 2020; Mckinney 2015). Unsurprisingly,  
143 human-primate interfaces are ‘hotspots’ for zoonotic transmission, spill-over, and emergence  
144 (Devaux et al. 2019; Kaur and Singh 2009; Lappan et al. 2020). NHPs may be vulnerable to  
145 many diseases contracted from humans (a recent study revealed that all African and Asian NHPs  
146 are vulnerable to infection from SARS-CoV-2: Melin et al. 2020), or act as natural reservoirs of  
147 pathogens that may invade and cause epidemics in otherwise uninfected human and wildlife  
148 populations . The genus *Macaca* are among the most ecologically and behaviorally flexible of all  
149 nonhuman primates. In the wild, many macaque species, particularly rhesus macaques, long-  
150 tailed macaques (*M. fascicularis*), and bonnet macaques (*M. radiata*), are considered ‘edge’  
151 wildlife species that form ‘synanthropic’ associations (Klegarth 2017) with humans across a  
152 variety of anthropogenic landscapes (e.g. cities, temples, fields) where they experience highly  
153 spatiotemporally variant overlap and interactions with humans (Gumert 2011; Riley 2007).  
154 Influenced by their ecology and evolutionary history, macaques also show marked variation in  
155 social behavior with their conspecifics and (consequently) social networks (Balasubramaniam et  
156 al. 2018a; Thierry 2007). While (anthropo)zoonotic agents have been extensively documented  
157 among macaque populations that are synanthropic with humans (Balasubramaniam et al. 2020a),

158 the social-ecological pathways that may underlie zoonotic transmission and outbreaks within  
159 such populations remain unclear.

160         Across human-macaque interfaces in India and Malaysia, we used network approaches  
161 combined with SIR models to evaluate the dynamics of zoonotic transmission and outbreaks  
162 among multiple groups and species of macaques. In doing so, we evaluated the relative  
163 vulnerability of these wildlife populations to zoonotic outbreaks through their social-ecological  
164 interactions with humans, and their social interactions with conspecifics. To capture patterns of  
165 macaques' social-ecological interactions with humans, we constructed networks of macaques'  
166 (nodes) shared tendencies to jointly engage in risk-taking or co-interacting with humans (edges),  
167 within the same time and location in the context of anthropogenic spaces (Balasubramaniam et  
168 al. 2021). To capture patterns of macaque-macaque social interactions, we constructed social  
169 'grooming networks' that linked macaques based on the proportions of time they spent engaging  
170 in grooming their conspecifics. In a previous study, we revealed that macaques' grooming  
171 relationships did not predict their tendencies to co-interact with humans, thereby establishing a  
172 premise to expect that their joint interactions with humans may offer different, somewhat  
173 independent pathways for zoonotic transmission than their social interactions with conspecifics  
174 (Balasubramaniam et al. 2021).

175         Independent of pathogen 'transmissibility' from an infected individual to a susceptible  
176 individual during its infectious period (Sah et al. 2018), we examined the impact of the  
177 behavioral ecology of wildlife host-species at HWIs on zoonotic outbreaks. Specifically, we  
178 examined the effects of hosts' interaction- or network-type (social-ecological co-interactions  
179 with humans, versus grooming of conspecifics), host-species (rhesus, long-tailed, and bonnet  
180 macaque), and their interactions with the network connectedness or (hereafter) centrality of the

181 first-infected macaque, on zoonotic transmission and outbreak sizes as predicted by  
182 epidemiological models. Consistent with previous research, we predicted that the connectedness  
183 or (hereafter) centrality of the first-infected macaque, irrespective of host-species and network-  
184 type, will be positively correlated to zoonotic outbreak sizes. We also examined whether the  
185 magnitude of this effect was different across network-type for each host-species, and across host-  
186 species for each network-type. Rhesus and long-tailed macaques, compared to bonnet macaques,  
187 typically show greater ecological flexibility and overlap with anthropogenic environments  
188 (Balasubramaniam et al. 2020b), as well as more nepotistic social systems characterized by  
189 greater tendencies for individuals to engage with specific subsets of group conspecifics than with  
190 others (Thierry 2007). Given these differences, across network-type for each host-species, we  
191 predicted that the co-interaction network centrality of first-infected macaques would have a  
192 stronger effect on outbreak sizes than grooming network centrality for rhesus macaques and  
193 long-tailed macaques, but that bonnet macaques would show the opposite effect. Across host-  
194 species for each network type, we predicted that the effect of co-interaction network centrality of  
195 first-infected macaques on outbreak sizes would be higher for rhesus macaques and long-tailed  
196 macaques compared to bonnet macaques, but that the effects of grooming network centrality on  
197 outbreak sizes would be the reverse (bonnet > rhesus and long-tailed macaques).

198 We also examined the effects of sociodemographic (sex, dominance rank) characteristics  
199 of the first-infected macaque on outbreak sizes. Since females and high-ranking individuals form  
200 the core of macaque grooming networks (Balasubramaniam et al. 2018a; Thierry 2007), we  
201 predicted that outbreak sizes through grooming networks would be higher when the first-infected  
202 individuals were females (versus males) and higher-ranking (versus lower-ranking) individuals.  
203 On the other hand, given the exploratory and increased risk-taking behavior of males resulting in



204 their being more well-connected in co-interaction networks compared to females  
205 (Balasubramaniam et al. 2020b, 2021), we predicted that outbreak sizes through co-interaction  
206 networks would be higher when the first-infected individuals are males (versus females). Finally,  
207 we also explored whether the overall anthropogenic exposure of first-infected macaques,  
208 specifically their frequencies of interactions with humans, and time spent foraging on  
209 anthropogenic food, influenced zoonotic outbreak sizes through both network-types.

210

## 211 **Materials and Methods:**

### 212 *Study locations and subjects:*

213 We observed 10 macaque groups representing three different species at human-primate  
214 interfaces across three locations in Asia – four groups of rhesus macaques in Shimla in Northern  
215 India (31.05<sup>0</sup>N, 77.1<sup>0</sup>E) between July 2016 and February 2018, four groups of long-tailed  
216 macaques in Kuala Lumpur in Malaysia (3.3<sup>0</sup>N, 101<sup>0</sup>E) between September 2016 and February  
217 2018, and two groups of bonnet macaques in Thenmala in Southern India (8.90<sup>0</sup>N, 77.10<sup>0</sup>E)  
218 between July 2017 and May 2018 (Supplementary Figure 1). All macaque groups were observed  
219 in (peri)urban environments, and their home-ranges overlapped with humans and anthropogenic  
220 settlements - e.g., Hindu temples (Shimla and Kuala Lumpur), recreational parks (outskirts of  
221 Kuala Lumpur, Thenmala), roadside areas (Thenmala, Shimla) – to varying extents  
222 (Balasubramaniam et al. 2020b; Kaburu et al. 2019; Marty et al. 2019a). Subjects were adult  
223 male and female macaques which were pre-identified during a two-month preliminary phase  
224 prior to data collection at each location. More details regarding the study locations, macaque  
225 group compositions and subjects, and observation efforts, may be found in our previous

226 publications (Balasubramaniam et al. 2020b; Kaburu et al. 2019; Marty et al. 2019a) and in  
227 Supplementary Table 1.

228 *Data collection:*

229 We collected behavioral and demographic data in a non-invasive manner using  
230 observation protocols that were standardized across observers within and across locations  
231 (details in Balasubramaniam et al. 2020b, 2021). All data were collected for five days a week,  
232 between 9:00 am and 5:00 pm. To record and spatiotemporally capture variation in human-  
233 macaque social-ecological interactions for the construction of co-interaction networks, we used  
234 an *event sampling* procedure (Altmann 1974; Kaburu et al. 2018). For this we divided pre-  
235 identified parts of the home range of each macaque group in which human-macaque interactions  
236 were most likely to occur, into blocks of roughly equal area and observability. We visited these  
237 blocks in a pre-identified, randomized order each day. Within a 10-minute sampling period, we  
238 recorded interactions between any pre-identified subject macaque and one or more humans that  
239 occurred within that block, in a sequential manner. Human-macaque interactions included all  
240 contact and non-contact behaviors initiated by macaques towards humans (e.g., approach,  
241 aggression, begging for food), or vice-versa (e.g. approach, aggression, provisioning with food)  
242 within a three-meter radius of each other (more details in Kaburu et al. 2019).

243 To record macaques' social behavior, and their overall anthropogenic exposure  
244 independent of spatiotemporal context, we used *focal animal sampling* (Altmann 1974). For this  
245 we followed individual subjects in a pre-determined, randomized sequence for 10-minute  
246 durations. In a continuous manner, we recorded, within each focal session, instances of social  
247 grooming, and dyadic agonistic interactions that involved aggression (threat, lunge, chase,  
248 attack) that was followed by submission (avoidance, silent bared teeth, flee), between the focal

249 animal and its group conspecifics. We also recorded interactions between the focal animal and  
250 one or more humans in a continuous manner (see above for definitions). Once every two  
251 minutes, we ceased recording continuous data to conduct a *point-time scan* (Altmann 1974) of  
252 the focal animal's main activity, i.e. one of resting, locomotion, socializing, interacting with a  
253 human, foraging on natural food, or foraging on anthropogenic food.

254 We entered all data into Samsung Galaxy Tablets using customized data forms created in  
255 HanDBase® application (DDH software). From these we exported and tabulated all the data into  
256 MS Excel and MS Access databases daily. All observers within and across locations passed  
257 inter-observer reliability tests using Cohen's kappa ( $> 0.85$ ) (Martin & Bateson 1993).

258 *Construction of co-interaction networks and grooming networks:*

259 From the human-macaque interactions collected using event sampling data, we  
260 constructed social-ecological co-interaction networks (Figure 1A). In these, nodes were  
261 individual macaques. Edges were based on the frequency with which pairs of macaques jointly  
262 engaged in interactions with humans at the same block and within the same event sampling  
263 session, per unit of event sampling observation time during which both members of the pair were  
264 present in the group and (thereby) observable (Balasubramaniam et al. 2021). We also  
265 constructed macaque-macaque social grooming networks using the focal sampling data (Figure  
266 1B). In these, we linked individual macaques (nodes) based on the frequency which they  
267 engaged in social grooming interactions per unit of total focal observation times (edges)  
268 calculated for each pair of macaques during the period of their overlapping tenure in the group.  
269 Our use of different types of data (event sampling versus focal sampling) to construct co-  
270 interaction networks and social grooming networks respectively, minimized the potentially

271 confounding effects of data inter-dependencies and sampling bias on our networks (Farine &  
272 Whitehead 2015).

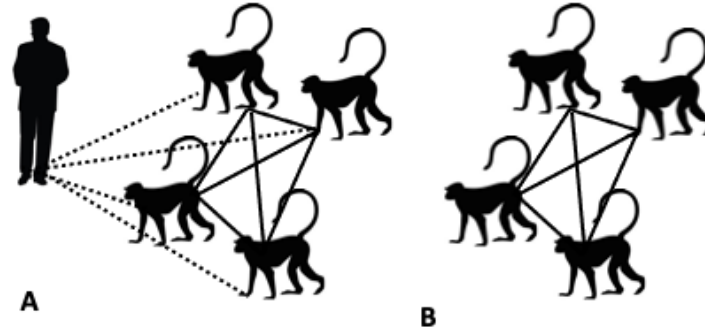

273  
274 **Figure 1: Construction of macaques' (A) human co-interaction networks and (B) social**  
275 **grooming networks. Dotted lines represent macaques' interactions with humans within the**  
276 **same (10-minute) time-window and space, which defined the edges of the co-interaction**  
277 **networks.**

278

279 *Calculation of Network Measures:*

280 For each co-interaction network and grooming network, we calculated three measures of  
281 individual or node-level centrality. We calculated (1) weighted degree or strength centrality, i.e.  
282 the number and sum of the edge-weights of an individuals' direct network connections, (2)  
283 betweenness centrality, i.e. the proportion of shortest paths connecting each pair of nodes that  
284 pass through a particular node, and (3) eigenvector centrality as the number and strength of an  
285 individuals' direct and secondary network connections (reviewed in Farine & Whitehead 2015;  
286 Wey et al. 2008). These centrality measures were selected based on the decision-trees pertaining  
287 to choosing appropriate network measures provided by Sosa et al. (2020); they are among the  
288 most biologically relevant to modeling disease transmission pathways through animal networks

289 (reviewed in Drewe & Perkins 2015). Specifically, strength indicates an individuals' immediate  
290 susceptibility to acquiring infectious agents from infected conspecifics to whom they are directly  
291 connected. Betweenness indicates the tendency for an individual to function as a 'bridge' or a  
292 'conduit' of disease spread. Eigenvector captures the reach of an individual within its network,  
293 and thereby its potential role in both acquiring and transmitting infectious agents to many other  
294 individuals. To account for cross-group differences in group size, we re-scaled centrality  
295 measures within each group into percentile values that ranged between 0 (least central  
296 individual) and 1 (most central individual).

297 *Macaque Sociodemographic Attributes and Overall Anthropogenic Exposure:*

298 From the data on dyadic agonistic interactions with clear winners and losers, we  
299 calculated macaques' dominance ranks for each group, separately for male-male and female-  
300 female interactions, using the network-based Percolation and flow-conductance method (Package  
301 *Perc* in R: Fujii et al. 2016), a network-based ranking method that has been shown to yield  
302 animal rank orders that are highly consistent with those yielded by other, popularly used ranking  
303 methods in behavioral ecology, such as David's score, I&SI ranks, and Elorating (Funkhouser et  
304 al. 2018). As with network centrality, we converted ordinal ranks of macaques within each group  
305 into percentile values that ranged between 0 (lowest-ranked individual) and 1 (highest-ranked  
306 individual). From the continuously collected focal sampling data, we calculated frequencies of  
307 human-macaque interactions per unit focal observation time. We also calculated, for each  
308 macaque, its time spent foraging on anthropogenic food as the ratio of the number of point-time  
309 scans in which it was foraging on anthropogenic food ( $F_a$ ) to the total number of scans in which  
310 it was foraging on either anthropogenic food ( $F_a$ ) or natural food ( $F_n$ ), i.e.  $F_a / (F_a + F_n)$ .

311 *Zoonotic disease simulations:*

312 To simulate the spread of zoonotic agents of varying transmissibility ( $\tau$ ) on macaques' co-  
313 interaction networks and grooming networks, we ran a series of Susceptible Infected Recovered  
314 (SIR) epidemiological models (using the *Epimdr* R package: Bjornstad 2020) (Figure 2A, B).  
315 We define ' $\tau$ ' as a pathogen-specific characteristic, i.e. its probability of infecting a susceptible  
316 host within its infectious period which is a function of the probability of pathogenic infection ( $\bar{\beta}$ )  
317 and recovery rate ( $\gamma$ ), and is calculated as  $\bar{\beta}/(\bar{\beta} + \gamma)$  (Sah et al. 2018). For each network-type  
318 (human co-interaction, social grooming) and macaque group, we ran 5000 model simulations,  
319 500 for each of 10 different values of  $\tau$  ranging from 0.05 – 0.50 in increments of 0.05. These  
320 selections were based on the human literature that indicates that these values of  $\tau$  correspond to  
321 zoonotic agents that range from low (e.g., influenza virus: Tuite et al. 2010), to moderate (e.g.,  
322 respiratory pathogens like SARS-CoV-2: Arienzo & Coniglio 2020), to high (e.g., measles virus:  
323 Anderson & May 1992) contagiousness, and average basic reproduction numbers ( $R_0$ ) of  
324 between 1.6 – 14.0 (Rushmore et al. 2014; Sah et al. 2018). We thus ran a total of 100,000  
325 simulations (5000 per macaque group times 10 groups times two network-types). In each  
326 simulation, we deemed all macaques within a group to be initially 'susceptible', and then  
327 infected one individual (node) at random with an artificial zoonotic agent of a given  $\tau$ . A  
328 simulation proceeded using a discrete time, chain binomial method (Bailey 1957; Sah et al.  
329 2018) that dynamically and temporally tracked the spread of infection through a weighted,  
330 undirected network through time (example in Figure 4B). In each simulation, animals were  
331 allowed to transition from 'susceptible' to 'infected' states, as a function of their network  
332 connections to individuals already in 'infected' states and the pathogen  $\tau$  value. 'Infected'  
333 individuals were then allowed to transition into 'recovered' states at a fixed recovery rate ( $\gamma$ ) of  
334 0.2 that corresponds to an average infectious period of five days (Sah et al. 2018). Each

335 simulation was allowed to proceed until the disease proceeded to extinction when there were no  
336 remaining infected individuals in the network. At the end of each simulation, we calculated the  
337 disease outcome of ‘mean outbreak size’, as the average % of infected macaques (the number of  
338 ‘infected’ individuals divided by the total number of individuals) across all time-units of the  
339 simulation. We also extracted, for each simulation, the identity of the first-infected macaque ‘k’  
340 (Figure 2A) and calculated an average of zoonotic outbreak sizes from across all its first-infected  
341 simulation runs. We then matched this individual-level mean outbreak size with the  
342 sociodemographic characteristics, network centrality, and overall anthropogenic exposure of this  
343 (first-infected) individual.

344

345 (A)

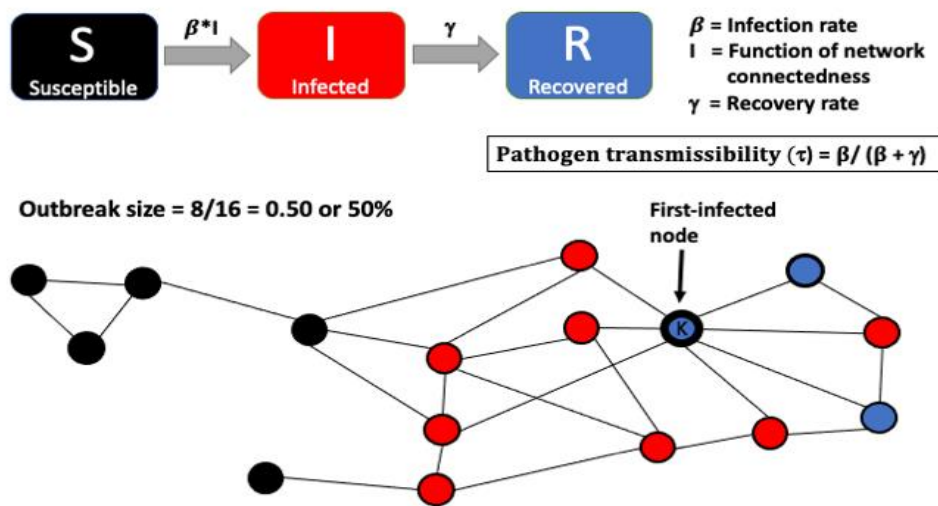

346

347 (B)

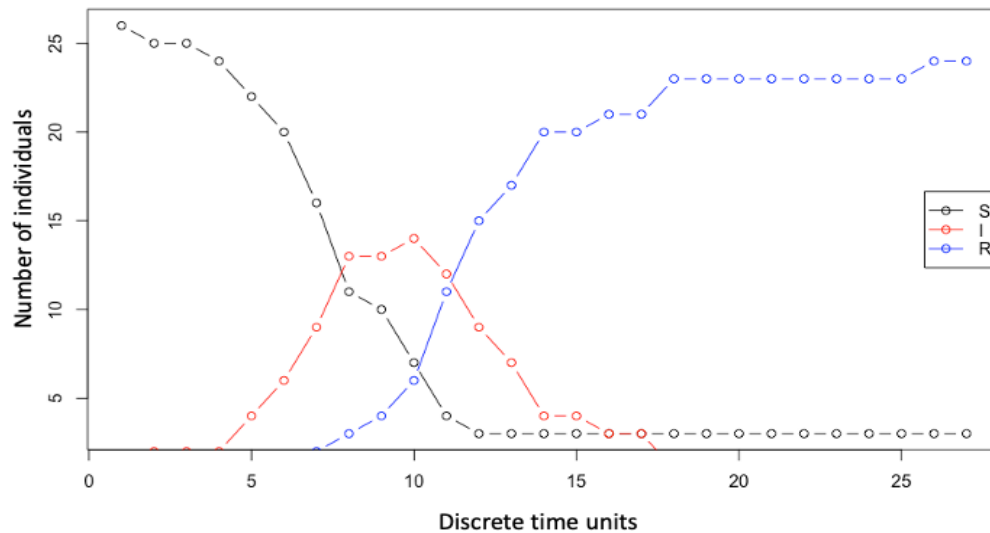

348

349 **Figure 2: A typical Susceptible Infected Recovered (SIR) model simulation of network-**  
350 **mediated disease transmission (A), and an output from a single discrete time-based SIR**  
351 **model simulation (B).**

352

353 *Statistical Analysis:*

354 We used General Linear Mixed Models (GLMMs) implementing a corrected Akaike  
355 Information Criterion (AICc)-based model-selection criterion (packages *Lme4* (Bates et al. 2015)  
356 and *MuMIn* (Burnham et al. 2011) to test our predictions. In all GLMMs, we set mean outbreak  
357 size calculated at the level of the individual macaque through their co-interaction networks  
358 and/or grooming networks as the outcome variable. We used a Gaussian function since outcome  
359 variables did not deviate from a normal distribution (Shapiro Wilcoxon tests:  $p > 0.05$  in each  
360 case). First, to examine the effect of the centrality of the first-infected macaque by network-type  
361 (co-interaction versus grooming) for a given host-species (bonnet or long-tailed or rhesus) on  
362 mean outbreak sizes, we ran three sets of three GLMMs each, one for each macaque species  
363 (details in Table 1A). In all models, we set the number of macaque subjects within the group (or



364 ‘effective group size’) to be an offset variable, since group size can impact our outcome variable  
365 of mean outbreak sizes (Griffin & Nunn 2012). In all models, we also included ‘animal ID’ (a  
366 repeated measure for co-interaction networks and grooming networks) nested within macaque  
367 ‘group ID’ as a random effect to control for intraspecific variation. For each species, we ran three  
368 models, in each of which we included just one of the three different network measures of the  
369 centrality of the first-infected macaque, i.e. the strength, betweenness, or eigenvector, as a main  
370 effect. We used this approach in order to avoid the confounding effects of potential inter-  
371 dependencies of network centrality measures (Farine & Whitehead 2015). In each of these three  
372 models, we also included an interaction term of network centrality by network-type (co-  
373 interaction versus grooming), to determine whether the magnitude of these effects were different  
374 for different types of interactions. In all models, we also included, as main effects, the  
375 sociodemographic attributes (sex, dominance rank) and the overall anthropogenic exposure  
376 (frequencies of interactions with humans, proportions of time spent foraging on anthropogenic  
377 food) of the first-infected macaque. From each model-set of three models, we identified a single  
378 best-fit model with a difference in AICc of at least 8 points or lower than the next best-fit model  
379 (Burnham et al. 2011).

380         Second, to examine the effect of the centrality of the first-infected macaque by species  
381 (bonnet versus long-tailed versus rhesus) for a given network-type (co-interaction or grooming)  
382 on mean outbreak sizes, we ran two sets of three GLMMs each, one for each network-type  
383 (details in Table 1B). Once again, we set the number of macaque subjects to be an offset  
384 variable, and included ‘group ID’ as a random effect, in all the models. For each network-type,  
385 we once again ran three models, in each of which we included just one of the three different  
386 measures of the centrality of the first-infected macaque as a main effect. In each of these three

387 models, we also included an interaction term of network centrality by host-species (bonnet  
388 versus long-tailed versus rhesus), to determine whether the magnitude of these effects were  
389 different for different species. Again we included, as main effects, the sociodemographic  
390 attributes (sex, dominance rank) and the overall anthropogenic exposure (frequencies of  
391 interactions with humans, proportions of time spent foraging on anthropogenic food) of the first-  
392 infected macaque. From each model-set of three models, we identified a single best-fit model  
393 with a difference in AICc < 8 points from the next best-fit model (Burnham et al. 2011).

394 To account for inter-dependencies across network measures, we used a post-network  
395 ‘node-swapping’ randomization procedure to calculate permuted p ( $p_{perm}$ ) values for the observed  
396 model coefficients for predictor variables from each best-fit model (Farine & Whitehead 2015;  
397 Weiss et al. 2020). Specifically, we compared observed model coefficients to a distribution of  
398 coefficients generated by re-running the best-fit GLMM 1000 times, each following randomized  
399 re-assignments of the observed network centrality scores across individuals within each macaque  
400 group. All GLMMs met the necessary assumptions of model validity (i.e., distribution of  
401 residuals, residuals plotted against fitted values: Quinn & Keough 2002). All statistical tests were  
402 two-tailed, and we set the p values to attain statistical significance to be < 0.05.

403

404 **Table 1: Summary of GLMM sets to examine the impact of the centrality of the (A) the**  
405 **first-infected macaque by network-type for a given host-species, and (B) the first-infected**  
406 **macaque by species for a given network-type, on zoonotic outbreak sizes**

| <b>(A) Effects of the first-infected macaque by network-type for a given species</b> |                             |                        |
|--------------------------------------------------------------------------------------|-----------------------------|------------------------|
| <b>Bonnet macaques</b>                                                               | <b>Long-tailed macaques</b> | <b>Rhesus macaques</b> |
| 3 models                                                                             | 3 models                    | 3 models               |

|                                                                                      |                                                        |                                                        |
|--------------------------------------------------------------------------------------|--------------------------------------------------------|--------------------------------------------------------|
| (on 76 individuals repeated across two network-types)                                | (on 112 individuals repeated across two network-types) | (on 151 individuals repeated across two network-types) |
| <b>(B) Effects of the first-infected macaque by species for a given network-type</b> |                                                        |                                                        |
| <b>Co-interaction networks</b>                                                       |                                                        | <b>Grooming networks</b>                               |
| 3 models<br>(on 339 individuals across three species)                                |                                                        | 3 models<br>(on 339 individuals across three species)  |

407

408

409 **Results:**

410 *Impact of the centrality of first-infected individuals by network-type and host-species on zoonotic*  
 411 *outbreak sizes:*

412 In support of our prediction, we found that across network-types and host-species, the  
 413 strength centrality of the first-infected macaque, which better predicted outbreak sizes than  
 414 betweenness centrality or eigenvector centrality (model 1 in Supplementary Tables 2A-C, 3A-B),  
 415 was significantly, positively correlated to mean outbreak size (Tables 2 and 3; Figures 3 and 4).  
 416 Moreover, the magnitude of these effects of first-infected macaque centrality on outbreak sizes  
 417 varied across network types and species, although not always in the predicted directions.

418 For a given host-species but across the two different types of networks, we found a  
 419 significant interaction between network-type and strength centrality for rhesus macaques and  
 420 bonnet macaques, but not for long-tailed macaques (Table 2; Figure 3). As predicted, rhesus  
 421 macaques showed a significantly stronger effect of the mean centrality of first-infected  
 422 individuals on outbreak sizes through their co-interaction networks compared to their grooming  
 423 networks (Table 2; Figure 3). In other words, disease-causing agents were likely to infect more  
 424 individuals if they entered into a population by first infecting monkeys that were more central in

425 human co-interaction networks, compared to by first infecting monkeys that were more central in  
 426 grooming networks. Contrary to our predictions, bonnet macaques also showed the same (rather  
 427 than the opposite) effect as rhesus macaques, although the magnitude of difference was  
 428 somewhat lesser than for rhesus (Table 2; Figure 3). Finally, although the centrality of first-  
 429 infected macaques within their co-interaction networks once again showed an overall greater  
 430 effect on outbreak sizes than the centrality of macaques within their grooming networks for long-  
 431 tailed macaques, this difference was not significant (Table 2; Figure 3). Moreover, long-tailed  
 432 macaques also seemed to show separate groupings within each network-type (Figure 3),  
 433 suggesting possible intra-specific differences in the effects of the network centrality of macaques  
 434 within each network-type on outbreak sizes (see Discussion).

435

436 **Table 2: Standardized model coefficients from the best-fit GLMMs (model 1 from**  
 437 **Supplementary Tables 2A, 2B and 2C) of network centrality of the first-infected ‘patient-**  
 438 **zero’ macaque by network-type (co-interaction vs grooming) for a given host-species. In**  
 439 **each model, we included macaque animal ID (repeated measure across network-type)**  
 440 **nested within group ID as random effects, to account for intraspecific variation.**

| Predictor                             | Model Coefficients |                      |                 |
|---------------------------------------|--------------------|----------------------|-----------------|
|                                       | Bonnet macaques    | Long-tailed macaques | Rhesus macaques |
| (Intercept)                           | 1.20*              | 0.95*                | 0.64*           |
| Sex (males vs females)                | -0.07*             | -0.01                | -0.03           |
| Rank percentile                       | 0.01               | 0.05                 | 0.04            |
| Network (grooming vs co-interaction)  | -0.10**            | 0.12**               | -0.21**         |
| Network strength (co-interaction)     | 0.37**             | 0.22**               | 0.91**          |
| Network strength (grooming)           | 0.18**             | 0.16**               | 0.28**          |
| Frequency of interactions with humans | 0.04               | 0.03                 | 0.02            |
| Foraging on anthropogenic food        | 0.04               | 0.01                 | -0.04           |

---

|                                               |         |       |         |
|-----------------------------------------------|---------|-------|---------|
| Network strength (grooming vs co-interaction) | -0.19** | -0.06 | -0.63** |
|-----------------------------------------------|---------|-------|---------|

---

441 \*p < 0.05; \*\*p < 0.01

442 Note: p values were calculated after re-running the GLMMs using network centrality measures generated from 1000 post-  
443 network randomizations or node-swappings conducted on the co-interaction network and the grooming network.

444

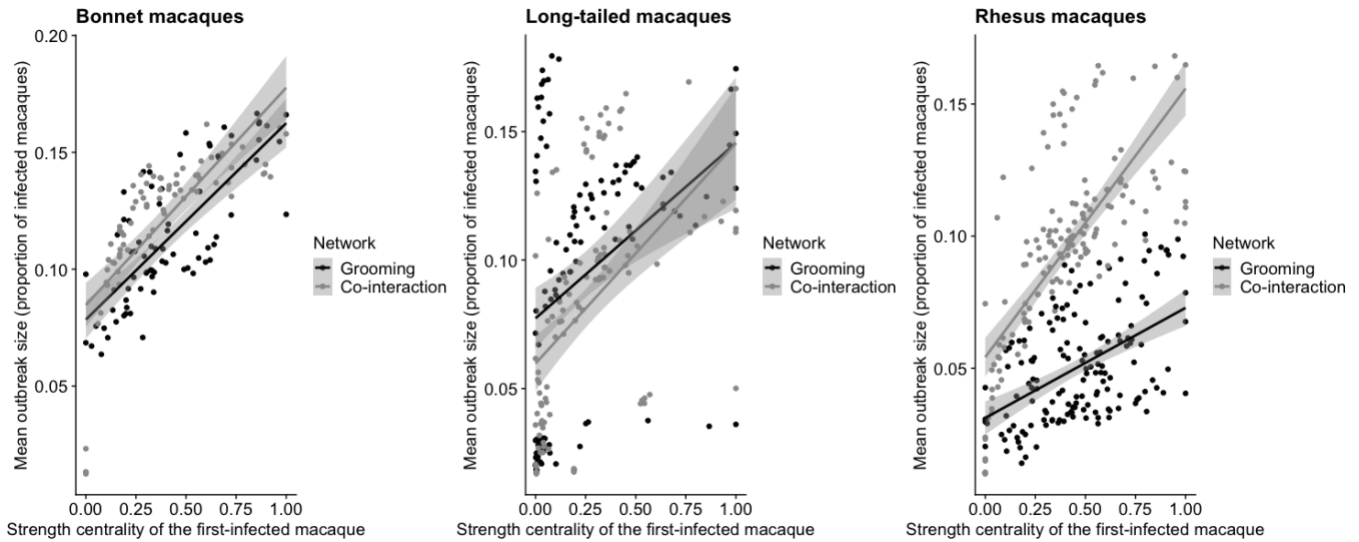

445

446 **Figure 3: Scatterplots showing positive correlations between the strength centrality of first-**  
447 **infected macaques by network-type for each host-species.**

448

449 For a given network-type but across host-species, we found a significant interaction

450 between species and strength centrality for both co-interaction networks and grooming networks

451 (Table 3). For co-interaction networks, rhesus macaques showed the strongest effect of strength

452 centrality on outbreak sizes as predicted. Contrary to our predictions, bonnet macaques fell

453 within the range of rhesus macaques, and long-tailed macaques showed a significantly lower

454 effect than both rhesus and bonnet macaques (Table 3; Figure 4). For grooming networks, the

455 differences were in the directions we predicted – bonnet macaques showed the strongest effects

456 of strength centrality on outbreak sizes, followed by long-tailed macaques, and finally rhesus

457 macaques that showed a significantly lower effect compared to bonnet macaques (Table 3;

458 Figure 4). For all three species, the magnitude of the effects of strength centrality on outbreak

459 sizes was markedly greater for co-interaction networks compared to grooming networks (Figure  
460 4). In other words, across host-species, the infection of macaques that were central in their co-  
461 interaction networks led to consistently higher zoonotic outbreaks (more individuals infected)  
462 than the infection of macaques that were central in their grooming networks.

463 For grooming networks, but not for co-interaction networks, we also found a significant  
464 effect of sex and dominance rank of the first-infected individual on mean outbreak sizes –  
465 zoonotic outbreak sizes were higher when first-infected macaques within grooming networks  
466 were females compared to males, and higher-ranking compared to lower-ranking individuals  
467 (Table 3). However, the magnitude of these effects were much lower than those of the strength  
468 centrality of first-infected macaques (Table 3). Finally, the overall anthropogenic exposure of  
469 first-infected macaques, i.e. their frequencies of interactions with humans and times spent  
470 foraging on human foods, had no impact on zoonotic outbreak sizes (Tables 2, 3).

471

472 **Table 3: Standardized model coefficients from the best-fit GLMMs (model 1 in**  
473 **Supplementary Table 3A and 3B) of network centrality of the first-infected ‘patient-zero’**  
474 **macaque by species (bonnet vs long-tailed vs rhesus macaques) for a given network-type. In**  
475 **each model, we included macaque group ID as a random effect, to account for intraspecific**  
476 **variation.**

---

| Predictor                       | Model Coefficients      |                   |
|---------------------------------|-------------------------|-------------------|
|                                 | Co-interaction networks | Grooming networks |
| (Intercept)                     | 1.20**                  | 1.19**            |
| Sex (males vs females)          | -0.03                   | -0.05*            |
| Rank percentile                 | 0.02                    | 0.03*             |
| Species (long-tailed vs bonnet) | -0.27                   | -0.14             |
| Species (rhesus vs bonnet)      | -0.23                   | -0.65             |
| Species (long-tailed vs rhesus) | -0.04                   | 0.50              |

---

|                                         |        |        |
|-----------------------------------------|--------|--------|
| Strength (bonnet)                       | 0.49** | 0.25** |
| Strength (long-tailed)                  | 0.38** | 0.21** |
| Strength (rhesus)                       | 0.48** | 0.17** |
| Frequency of human-macaque interactions | 0.00   | 0.01   |
| Foraging on anthropogenic food          | 0.02   | 0.01   |
| Strength (long-tailed vs bonnet)        | -0.11* | -0.04  |
| Strength (rhesus vs bonnet)             | -0.01  | -0.08* |
| Strength (long-tailed vs rhesus)        | 0.10*  | 0.04   |

477 \*p < 0.05; \*\*p < 0.01

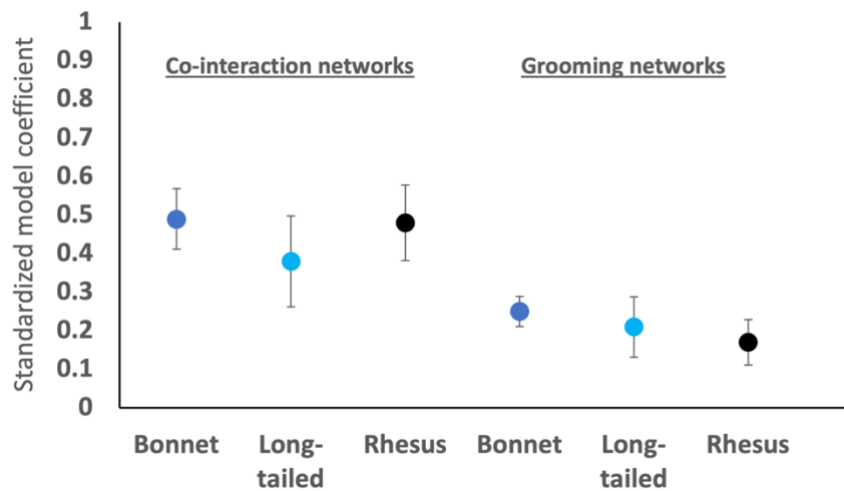

478

479 **Figure 4: Plots of standardized model-coefficients (Y-axis; values from Table 2) to show the**  
480 **difference in effects of the strength centrality of first-infected macaques on zoonotic**  
481 **outbreak sizes through co-interaction networks and grooming networks. Coefficients for**  
482 **the same host-species are colored the same (dark blue = bonnet macaques; light blue =**  
483 **long-tailed macaques; black = rhesus macaques). Error bars represent 95% confidence**  
484 **intervals for each coefficient.**

485

#### 486 **Discussion:**

487 We addressed a critical gap in our understanding of how zoonotic agents may spread and  
488 cause outbreaks among wildlife populations at HWIs. Adopting a comparative, network-based

489 approach, we showed that zoonotic outbreaks among wild primate populations living in  
490 anthropogenic environments may reach higher outbreak sizes by spreading through animals'  
491 joint social-ecological interactions with humans, than by spreading through their social  
492 interactions with conspecifics.

493         Zoonotic outbreak sizes were positively predicted by the centrality of the first-infected  
494 macaque within both their human co-interaction networks their grooming networks. By  
495 comparing the risk of zoonotic outbreaks posed by two different types of interactions, i.e. based  
496 on both interactions with conspecifics and with humans, we build on previous, network-based  
497 studies that have focused on modeling zoonotic outbreaks among wildlife populations through  
498 just interactions with conspecifics (e.g. European badgers, *Meles meles*: Rozins et al. 2018;  
499 chimpanzees: Rushmore et al. 2014; barbary macaques, *Macaca sylvanus*: Carne et al. 2017;  
500 interspecies comparative studies: Sah et al. 2018). Among the most widespread, ecologically  
501 flexible of all mammals outside of the family Rodentia, wild macaques may live in dense  
502 populations in a variety of anthropogenic environments (e.g. urban, agricultural, forest-  
503 fragmented habitats) throughout their geographic range, where they frequently interact with  
504 people. Thus, our finding that macaques' tendencies to jointly interact with people make them  
505 especially highly vulnerable to zoonotic outbreaks has implications for our understanding of  
506 contemporary evolution and behavioral flexibility of wild animals living under increasing human  
507 impact. We previously speculated that such joint risk-taking may better enable wild primates to  
508 procure high-energy anthropogenic foods (Balasubramaniam et al. 2020b). Here, our findings  
509 suggest that the potential benefits of procuring such foods may be offset by high zoonotic risk.  
510 As such, our approaches in this study should encourage similar efforts on other wildlife  
511 populations that better distinguish between the (relative) effects of human-wildlife compared to



512 wildlife-wildlife interactions on disease transmission and outbreaks among wildlife groups (e.g.  
513 elephants, *Loxodonta africana*, in agricultural fields: Chiyo et al. 2012; co-occurrence and space-  
514 use sharing of wild ungulates and livestock: VanderWaal et al. 2014b; human provisioning of  
515 birds and raccoons, *Procyon lotor*, in urban environments: Bradley & Altizer 2007).

516 For all three species, we found that the centrality of macaques within their co-interaction  
517 networks consistently led to higher zoonotic outbreak sizes compared to their centrality within  
518 grooming networks. In other words, the joint propensities for animals to aggregate around and  
519 interact with humans may lead to an even greater vulnerability of wildlife populations to  
520 zoonotic outbreaks than their interactions with conspecifics. This finding has major implications  
521 for “One Health” perspectives (Cunningham 2017; Zinsstag et al. 2011). To-date, research on  
522 disease transmission through wildlife populations has identified ‘superspreaders’ of pathogens  
523 that, in lieu of being more well-connected to other individuals and populations, may function as  
524 effective targets for disease control (e.g. vaccination, antimicrobial treatment: Drewe & Perkins  
525 2015; Lloyd-Smith et al. 2005; Rushmore et al. 2014). Our findings suggest that macaques which  
526 are central in their human co-interaction networks may be especially effective targets, since these  
527 individuals may both function as intra-species superspreaders as well as pose a high risk of inter-  
528 species (humans-to-macaques, or vice-versa) disease spillover events since they inter-connect  
529 humans with whom they interact within and across time and space. Confirmation of this await  
530 future studies at HWIs that implement multi-modal networks that include pre-identified  
531 individual wildlife but also anthropogenic factors (individual humans, livestock, feral mammals)  
532 as nodes that are interlinked based on their shared space-use or social interactions (Silk et al.  
533 2019). In particular, identifying points of wildlife-to-human disease spill-over are of utmost

534 importance for preventing or controlling future pandemics like COVID-19 (Gryseels et al. 2020;  
535 Lappan et al. 2020).

536         We found cross-species differences in the extent to which co-interaction networks more  
537 strongly predicted zoonotic outbreak sizes compared to grooming networks. As predicted, rhesus  
538 macaques were the most vulnerable to zoonotic outbreaks through co-interaction networks, and  
539 the least vulnerable through their grooming networks. This highlights the importance of  
540 evaluating the relative effects of multiple (rather than single, as is often the case) single aspects  
541 of animal ecology on disease transmission. Rhesus macaques, more so than the other two  
542 macaque species, may preferentially engage in affiliative behaviors such as grooming with close  
543 kin (Thierry 2007); the resultant sub-grouping of individuals within their social networks may  
544 potentially function as ‘social bottlenecks’ to disease transmission in this species  
545 (Balasubramaniam et al. 2018; Griffin & Nunn 2012). Yet animals that show sub-divided social  
546 networks may nevertheless be vulnerable to outbreaks through other types of associations, and  
547 often in specific social-ecological contexts around human-provisioned food that may cause wild  
548 animals to aggregate together (Bradley and Altizer 2007) and co-interact with people (as we have  
549 shown).

550         Contrary to our predictions the effects of co-interaction networks on outbreak sizes in  
551 bonnet macaques were marginally greater (rather than lesser) than the effects of grooming  
552 networks, and were in fact within the range of rhesus macaques. One reason for this may be the  
553 spatial distribution of human-wildlife interactions in this population. Bonnet macaques are less  
554 geographically widespread and ecologically flexible compared to rhesus macaques. Although the  
555 bonnet macaques in our study experienced markedly lower frequencies of interactions with  
556 humans compared to rhesus macaques and long-tailed macaques (Krishna N. Balasubramaniam,

557 Marty, Samartino, Sobrino, Gill, Ismail, et al. 2020), these interactions were highly geospatially  
558 restricted to within specific areas or ‘blocks’ within their home-range. It is likely that such  
559 spatially dense social-ecological associations with people, through increasing the connectivity of  
560 macaques within their co-interaction networks, leads to a considerable increase in the risk of  
561 zoonotic outbreaks despite their relatively lower overall frequencies of interactions with humans.  
562 More generally, this finding suggests that zoonotic agents may enter into and rapidly spread even  
563 through populations of less ecologically flexible wildlife that, despite interacting less frequently  
564 with humans, may congregate around anthropogenic factors within specific parts of their home-  
565 range (e.g., contexts of food provisioning: Marty et al. 2019b; crop-foraging: Chiyo et al. 2012;  
566 ecotourism activity: Carne et al. 2017). Aside from being the least ecologically flexible of the  
567 three species in this study, bonnet macaques are also the most vulnerable to human-impact, with  
568 many populations threatened by local extinction (Radhakrishna & Sinha 2011). Thus, the  
569 identification and treatment of potential superspreaders may be critical in this population.

570         Contrary to our prediction, long-tailed macaques showed no differences in zoonotic  
571 outbreak sizes across network-types. At least one explanation for this may be intra-specific  
572 variation, specifically between-group differences in their overall exposure to humans. We  
573 observed two groups of long-tailed macaques at a Hindu temple and popular tourist location  
574 within Kuala Lumpur, where the monkeys were exposed to dense human populations with whom  
575 they interacted highly frequently (Marty et al. 2019a). On the other hand, we observed two other  
576 groups in at a recreational park at the edge of the city bordering a fragmented forest area, where  
577 interactions with humans were comparatively less frequent (Marty et al. 2019a). Moreover, long-  
578 tailed macaques also showed marked differences in their grooming behavior across these  
579 locations as a response to interactions with humans (Marty et al. 2019a). This explanation seems

580 to be supported by the separate groupings for the relationships between network centrality and  
581 outbreak sizes for long-tailed macaques, even for the same network-type (Figure 1). A more  
582 comprehensive assessment of the disease vulnerability of these populations would require  
583 within-species, cross-group comparisons.

584 Zoonotic outbreak sizes through macaques' grooming networks were generally higher  
585 when the first-infected individuals were females compared to males, or when they were higher-  
586 ranking compared to lower-ranking individuals. Nevertheless, the effects of sex and dominance  
587 rank on zoonotic outbreaks were a lot weaker than the effects of individuals' network centrality.  
588 In many wildlife species, animals' sociodemographic attributes like their sex and dominance  
589 rank may influence their life-history, behavioral strategies, and adaptive responses to changing  
590 (anthropogenic) environments (Balasubramaniam et al. 2020b; Chiyo et al. 2012). It is therefore  
591 important to evaluate the potentially interactive effects of such factors with animals' network  
592 connectedness on zoonotic outbreaks.

593 The consistently stronger effects of strength centrality compared to betweenness  
594 centrality or eigenvector centrality on outbreak sizes suggests that animals' direct connections  
595 played a greater role in disease transmission than their secondary connections. This finding is  
596 largely consistent with previous epidemiological studies (Drewe & Perkins 2015), with some  
597 notable exceptions (e.g., betweenness as a stronger predictor of outbreaks across communities of  
598 humans (Funk et al. 2010) and chimpanzees (Rushmore et al. 2014). Such differences in the role  
599 of direct versus indirect connections in disease transmission may depend on the host population,  
600 network-type, or more global aspects of networks such as sub-grouping or *community modularity*  
601 (Griffin & Nunn 2012) or the *efficiency* of information transfer (Romano et al. 2018). Examining  
602 how these global aspects of macaques' co-interaction networks and grooming networks may

603 impact zoonotic transmission and outbreak sizes in these populations would be a critical next  
604 step.

605 Our results were independent of pathogen-specific transmissibility which, through  
606 influencing basic reproduction numbers ( $R_0$  values), may strongly impact zoonotic outbreaks.  
607 We chose to account for, rather than quantitatively evaluate, the effects of a suite of zoonotic  
608 respiratory pathogens of different transmissibility (e.g., influenza virus, measles virus,  
609 *Mycobacterium* spp., SARs-CoV-2), that typically spread through social interactions and are  
610 capable of causing disease in both humans and other primates (Rushmore et al. 2014; Sah et al.  
611 2018). Pathogen transmissibility may interact with animal ecology in complicated ways to  
612 influence outbreak sizes. For instance, the effects of animal social interactions on zoonotic  
613 outbreaks may diminish for pathogens of exceptionally high transmissibility which may reach  
614 high outbreak sizes irrespective of social connections (Rushmore et al. 2014; Sah et al. 2018).  
615 Yet other studies have revealed that social interactions have stronger effects on outbreak sizes for  
616 pathogens of intermediate compared to low or high transmissibility (Rozins et al. 2018). Given  
617 the current lack of disease parameters on these macaque populations, our pathogen  
618 transmissibility values were also based on the human epidemiological literature (similar to other  
619 epidemiological studies on wildlife populations reviewed above). Inter-host and inter-pathogen  
620 differences would need to be considered in future studies that construct more sophisticated but  
621 system-specific epidemiological models.

622

### 623 **Acknowledgements:**

624 We thank the following organizations - the Himachal Pradesh Forest Department in  
625 India, Economic Planning Unit Malaysia, the Forestry Department of Peninsular Malaysia, the

626 Department of Wildlife and National Parks Peninsular Malaysia, Tourism Selangor, and the  
627 Thenmala Forest and Wildlife Department - for their assistance through providing permission  
628 and logistical support to conduct research in India and Malaysia. Within these organizations, we  
629 are especially grateful to Drs. Lalith Mohan, Sandeep Rattan, Nadine Ruppert, Ahmad Ismail,  
630 Sahrul Anuar Mohd Shah, and Ullasa Kodandaramaiah, for their assistance and support. We  
631 grateful to research assistants Shelby Samartino, Mohammed Ismail, Taniya Gill, Alvaro  
632 Sobrino, Rajarshi Saha, Camille Luccisano, Eduardo Saczek, Silvia La Gala, Nur Atiqua Tahir,  
633 Rachael Hume, Kawaljit Kaur, Bidisha Chakraborty, Benjamin Sipes, Pooja Dongre, and Menno  
634 van Berkel for their involvement in data collection, processing, and storage in the field. The data  
635 for this study was collected as part of a human-primate Coupled Natural and Human Systems  
636 project supported by the U.S. National Science Foundation (Grant no. 1518555) awarded to PI  
637 McCowan.

638

639 **Author Contributions:**

640 K.N.B (first- and corresponding-author), under the supervision of E. A. and B.M., took  
641 the lead in in the study design, supervision of data collection, and the conductance of data  
642 analysis and manuscript writing. N. A. provided assistance with designing the study and writing  
643 the manuscript. B.A.B. and E.B.M. were involved in the formulation of field data collection  
644 procedures and manuscript writing. P.M., S.S.K., and M.A. were all involved in the designing  
645 and supervision of field-work (data collection), and participated in manuscript writing. E.A. and  
646 B.M. supervised the entire study.

647

648 **Competing Interests:**

649 The authors declare no competing interests.

650

651 **References:**

652 Altmann, J. (1974). Observational Study of Behavior: Sampling Methods. *Behaviour* 49, 227–  
653 267.

654

655 Anderson, R. M. & May, R. M. (1992). *Infectious Diseases of Humans: Dynamics and Control*.  
656 Oxford University Press.

657

658 Arienzo, M. D. & Coniglio, A. (2020) Assessment of the SARS-CoV-2 basic reproduction  
659 number,  $R_0$ , based on the early phase of COVID-19 outbreak in Italy. *Biosaf. Heal.* 2, 57–59.

660

661 Bailey, N. T. (1957). *The Mathematical Theory of Epidemics*. Griffin, London.

662 Balasubramaniam, K. N., Beisner, B. A., Guan, J., Vandeleest, J., Fushing, H., Atwill, E. R.,  
663 & McCowan, B. J. (2018). Social network community structure and the contact-mediated  
664 sharing of commensal *E. coli* among captive rhesus macaques (*Macaca mulatta*). *PeerJ*, 6,  
665 e4271.

666 Balasubramaniam, K. N., Beisner, B. A., Berman, C. M., De Marco, A., Duboscq, J., Koirala, S.,  
667 Majolo, B., MacIntosh, A. J. J., McFarland, R., Molesti, S., Ogawa, H., Petit, O., Schino, G.,  
668 Sosa, S., Sueur, C., Thierry, B., de Waal, F. B. M., & McCowan, B. J. (2018). The influence of  
669 phylogeny, social style, and sociodemographic factors on macaque social network structure.  
670 *American Journal of Primatology*, 80, e227227.

671

- 672 Balasubramaniam, K. N., Marty, P. R., Samartino, S., Sobrino, A., Saha, R., Gill, T., Ismail, M.,  
673 Beisner, B. A., Kaburu, S. S. K., Bliss-Moreau, E., Arlet, M., Ruppert, N., Ismail, A., Sah, S. A.  
674 M., Mohan, L., Rattan, S., Kodandaramaiah, U., & McCowan, B. (2020a). Impact of individual  
675 demographic and social factors on human-wildlife interactions: A comparative study of three  
676 macaque species. *Scientific Reports*, 10, 21991.
- 677 Balasubramaniam, K. N., Huffman, M. A., Sueur, C., & Macintosh, A. J. J. (2020b). Primate  
678 infectious disease ecology: insights and future directions at the human-macaque interface. *In:*  
679 *The Behavioral Ecology of the Tibetan Macaque* (Eds. J. Li, L. Sun, & P. M. Kappeler).  
680 Fascinating Life Sciences. Springer, Cham, 249-284.
- 681 Balasubramaniam, K. N., Kaburu, S. S. K., Marty, P. R., Beisner, B. A., Bliss-Moreau, E.,  
682 Mohan, L., Rattan, S., Ruppert, N., Sah, S. A. M., Kodandaramaiah, U., & McCowan, B. (2021).  
683 Implementing network approaches to understand the socio-ecology of human-wildlife  
684 interactions. *EcoEvoRxiv*. doi: <https://ecoevorxiv.org/zf2ug/>
- 685 Bansal, S. Grenfell, B. T. & Meyers, L. A. (2007). When individual behaviour matters:  
686 homogeneous and network models in epidemiology. *J. R. Soc. Interface* 4, 879–891.  
687
- 688 Bates, D., Maechler, M., Bolker, B. & Walker, S. (2015). Fitting linear mixed effects models using  
689 lme4. *J. Stat. Softw.* 67, 1–48.  
690
- 691 Bjornstad, O. N. (2020). Package ‘epimdr’.  
692
- 693 Bradley, C. A. & Altizer, S. (2007). Urbanization and the ecology of wildlife diseases. *Trends*



694 *Ecol. Evol.* 22, 95–102.

695

696 Brauer, F. (2008). Compartmental models in epidemiology, chapter 2. In *Mathematical*

697 *Epidemiology* (eds. Brauer, F., van den Driessche, P. & Wu, J.). Springer, UK.

698

699 Burnham, K. P., Anderson, D. R. & Huyvaert, K. P. (2011). AIC model selection and  
700 multimodel inference in behavioral ecology: some background, observations, and comparisons.

701 *Behav. Ecol. Sociobiol.* 65, 23–35.

702

703 Carne, C., Semple, S., MacLarnon, A., Majolo, B. & Maréchal, L. (2017). Implications of

704 Tourist–Macaque Interactions for Disease Transmission. *Ecohealth* 14, 704–717.

705

706 Chiyo, P. I., Moss, C. J. & Alberts, S. C. (2012). The influence of life history milestones and  
707 association networks on crop-raiding behavior in male African elephants. *PLoS ONE* 7, e31382.

708

709 Craft, M. E. (2015). Infectious disease transmission and contact networks in wildlife and  
710 livestock. *Philos. Trans. R. Soc. B Biol. Sci.* 370, 20140107.

711

712 Cunningham, A. A. (2017). One health, emerging infectious diseases and wildlife. *Philos. Trans.*

713 *R. Soc. Lond. B. Biol. Sci.* 372, 4.

714

715 Daszak, P., Cunningham, A. A. & Hyatt, A. D. (2000). Emerging Infectious Diseases of wildlife  
716 - threats to biodiversity and human health. *Science*, 287, 443–449.

717

718 Devaux, C. A., Mediannikov, O., Medkour, H. & Raoult, D. (2019). Infectious disease risk  
719 across the growing human-non human primate interface: A review of the evidence. *Front. Public*  
720 *Heal.* 7, 1–22.

721

722 Dickman, A. J. (2013). From Cheetahs to Chimpanzees: A comparative review of the drivers of  
723 human-carnivore conflict and human-primate conflict. *Folia Primatol.* 83, 377–387.

724

725 Drewe, J. A. (2010). Who infects whom? Social networks and tuberculosis transmission in wild  
726 meerkats. *Proc. R. Soc. B Biol. Sci.* 277, 633–642.

727

728 Drewe, J. A. & Perkins, S. E. (2015). Disease transmission in animal social networks. in *Animal*  
729 *Social Networks* (eds. Krause, J., James, R., Franks, D. W. & Croft, D. P.) 95–110. Oxford  
730 University Press, Oxford.

731

732 Engel, G. A. & Jones-Engel, L. (2011) The role of *Macaca fascicularis* in infectious disease  
733 transmission. in *Monkeys on the Edge: Ecology and Management of Long-tailed Macaques and*  
734 *their Interface with Humans* (eds. Gumert, M. D., Fuentes, A. & Jones-Engel, L.) 183–203.  
735 Cambridge University Press, Cambridge.

736

737 Epstein, J. & Axtell, R. (1996). *Growing artificial societies: social science from the bottom up.*  
738 MIT Press, Boston.

739

- 740 Farine, D. R. & Whitehead, H. (2015). Constructing, conducting and interpreting animal social  
741 networks. *J. Anim. Ecol.* 84, 1144–1163.  
742
- 743 Fuentes, A., & Hockings, K. J. (2010). The ethnoprimateological approach in primatology.  
744 *American Journal of Primatology* 72, 841–47.  
745
- 746 Fujii, K., Jin, J., Shev, A., Beisner, B., McCowan, B., & Fushing, H. (2016). Perc: Using  
747 percolation and conductance to find information flow certainty in a direct network (R Package  
748 Version 0.1.2.) <https://rdrr.io/cran/Perc/>.  
749
- 750 Funk, S., Salathé, M. & Jansen, V. A. A. (2010) Modelling the influence of human behaviour on  
751 the spread of infectious diseases: A review. *J. R. Soc. Interface* 7, 1247–1256.  
752
- 753 Funkhouser, J. A., Mayhew, J. A., Sheeran, L. K. & Mulcahy, J. B. (2018). Comparative  
754 Investigations of Social Context-Dependent Dominance in Captive Chimpanzees (*Pan*  
755 *troglydytes*) and Wild Tibetan Macaques (*Macaca thibetana*). *Sci. Rep.* 8, 1–15.  
756
- 757 Godfrey, S. S. (2013). Networks and the ecology of parasite transmission: A framework for  
758 wildlife parasitology. *Int. J. Parasitol. Parasites Wildl.* 2, 235–245.  
759
- 760 Godfrey, S. S., Bull, C. M., James, R. & Murray, K. (2009). Network structure and parasite  
761 transmission in a group living lizard, the gidgee skink, *Egernia stokesii*. *Behav. Ecol. Sociobiol.*  
762 63, 1045–1056.

763

764 Griffin, R. H. & Nunn, C. L. (2012). Community structure and the spread of infectious disease in  
765 primate social networks. *Evol. Ecol.* 26, 779–800.

766

767 Gryseels, S., Bruyn, L. De, Gyselings, R., Leendertz, H. & Leirs, H. (2020). Risk of human-to-  
768 wildlife transmission of SARS-CoV-2. *Mammal Review* 51, 272–292.

769

770 Gumert, M. D. (2011). A common monkey of Southeast Asia: longtailed macaque populations,  
771 ethnophoresy, and their occurrence in human environments. in *Monkeys on the edge: ecology*  
772 *and management of longtailed macaques and their interface with humans* (eds. Gumert, M. D.,  
773 Fuentes, A. & Jones-Engel, L.) 3–43. Cambridge University Press, Cambridge.

774

775 Hasegawa, M., Kishino, H. & Yano, T. (1985) Dating of the human-ape splitting by a molecular  
776 clock of mitochondrial DNA. *J. Mol. Evol.* 22, 160–174.

777

778 Kaburu, S. S. K., Marty, P. R., Beisner, B. A., Balasubramaniam, K. N., Bliss- Moreau, E.,  
779 Kaur, K., Mohan, L., & McCowan, B. (2019). Rates of human-monkey interactions affect  
780 grooming behaviour among urban-dwelling rhesus macaques (*Macaca mulatta*). *American*  
781 *Journal of Physical Anthropology*, 168, 92-103.

782

783 Kaur, T. & Singh, J. (2009). Primate-parasitic zoonoses and anthroozoonoses: a literature  
784 review. in *Primate Parasite Ecology: the Dynamics and Study of Host-Parasite Relationships*  
785 (eds. Huffman, M. A. & Chapman, C. A.) 199–230. Cambridge University Press, Cambridge.

786

787 Klegarth, A. (2017). Synanthropy. in *The International Encyclopedia of Primatology* (John  
788 Wiley & Sons, Inc.). doi: 10.1002/9781119179313.wbprim0448.

789

790 Lappan, S., Malaivijitnond, S., Radhakrishna, S., Riley, E. P. & Ruppert, N. (2020). The human–  
791 primate interface in the new normal: challenges and opportunities for primatologists in the  
792 COVID-19 era and beyond. *Am. J. Primatol.* 82, 1–12.

793

794 Lloyd-Smith, J. O., Schreiber, S. J., Kopp, P. E. & Getz, W. M. (2005). Superspreading and the  
795 effect of individual variation on disease emergence. *Nature* 438, 355–359.

796

797 MacIntosh, A. J. J., Jacobs, A., Garcia, C., Shimizu, K., Mouri, K., Huffman, M. A., &  
798 Hernandez, A. D. (2012). Monkeys in the Middle: Parasite Transmission through the Social  
799 Network of a Wild Primate. *PLoS One* 7, 15–21.

800

801 Martin, P. & Bateson, P. (1993). *Measuring behaviour*. Cambridge University Press, Cambridge.

802

803 Marty, P. R., Beisner, B. A., Kaburu, S. S. K., Balasubramaniam, K. N., Bliss-Moreau,  
804 E., Ruppert, N., Sah, S., Ahmad, I., Arlet, M. E., Atwill, R. A., & McCowan, B. (2019a).  
805 Time constraints imposed by anthropogenic environments alter social behaviour in long-  
806 tailed macaques. *Animal Behaviour*, 150, 157-165.

807

808 Marty, P. R., Balasubramaniam, K. N., Kaburu, S. S. K., Hubbard, J., Beisner, B.  
809 A., Bliss- Moreau, E., Arlet, M., Ruppert, N., Arlet, M. E., Sah, S. A. M., Ismail, A.,  
810 Mohan, L., Rattan, S. K., Kodandaramaiah, U., & McCowan, B. J. (2019b).  
811 Individuals in urban dwelling primate species face unequal benefits associated with  
812 living in an anthropogenic environment. *Primates*, 61, 245-259.  
813  
814 McCabe, C. M., Reader, S. M. & Nunn, C. L. (2014). Infectious disease, behavioural flexibility  
815 and the evolution of culture in primates. *Proc. R. Soc. B Biol. Sci.* 282. 20140862.  
816  
817 Melin, A. D., Janiak, M. C., Marrone, F., Arora, P. S. & Higham, J. P. (2020). Comparative  
818 ACE2 variation and primate COVID-19 risk. *Communications Biology* 3, 641.  
819  
820 Mckinney, T. (2015). A Classification System for Describing Anthropogenic Influence on  
821 Nonhuman Primate Populations. *American Journal of Primatology* 77: 715–26.  
822  
823 Nyhus, P. J. (2016). Human–Wildlife Conflict and Coexistence. *Annual Review of the*  
824 *Environment and Resources* 41, 143-171  
825  
826 Quinn, G. P. & Keough, M. J. (2002). *Experimental Designs and Data Analysis for Biologists*.  
827 Cambridge University Press, Cambridge.  
828  
829 Radhakrishna, S. & Sinha, A (2011). Less than wild? Commensal primates and wildlife  
830 conservation. *J. Biosci.* 36, 749–753.

831

832 Riley, E. P. (2007). The human-macaque interface: conservation implications of current and  
833 future overlap and conflict in Lore Lindu National Park, Sulawesi, Indonesia. *American*  
834 *Anthropologist* 109, 473–84.

835

836 Romano, V., Shen, M., Pansanel, J., MacIntosh, A. J. J. & Sueur, C. (2018). Social transmission  
837 in networks: global efficiency peaks with intermediate levels of modularity. *Behav Ecol*  
838 *Sociobiol* 72, 154.

839

840 Rozins, C., Silk, M. J., Croft, D. P., Delahay, R. J., Hodgson, D. J., McDonald, R. A., Weber, N.,  
841 & Boots, M. (2018). Social structure contains epidemics and regulates individual roles in disease  
842 transmission in a group-living mammal. *Ecol. Evol.* 8, 12044–12055.

843

844 Rushmore, J., Caillaud, D., Hall, R. J., Stumpf, R. M., Meyers, L. A., & Altizer, S. (2014).  
845 Network-based vaccination improves prospects for disease control in wild chimpanzees. *J. R.*  
846 *Soc. Interface* 11, 20140349.

847

848 Sah, P., Mann, J. & Bansal, S. (2018). Disease implications of animal social network structure: A  
849 synthesis across social systems. *J. Anim. Ecol.* 87, 546–558.

850

851 Silk, M. J., Hodgson, D. J., Rozins, C., Croft, D. P., Delahay, R. J., Boots, M., & McDonald, R.  
852 A. (2019). Integrating social behaviour, demography and disease dynamics in network models:

- 853 applications to disease management in declining wildlife populations. *Philos. Trans. R. Soc. B*  
854 *Biol. Sci.* 374, 20180211.
- 855
- 856 Thierry, B. (2007). Unity in diversity: Lessons from macaque societies. *Evol. Anthropol.* 16,  
857 224–238.
- 858
- 859 Townsend, A. K., Hawley, D. M., Stephenson, J. F. & Williams, K. E. G. (2020). Emerging  
860 infectious disease and the challenges of social distancing in human and non-human animals:  
861 EIDs and sociality. *Proc. R. Soc. B Biol. Sci.* 287, 20201039.
- 862
- 863 Tuite, A. R., Greer, A. L., Whelan, M., Winter, A., Lee, B., Yan, P., Wu, J., Moghadas, S.,  
864 Buckeridge, D., Pourbohloul, B., & Fisman, D. N. (2010). Estimated epidemiologic parameters  
865 and morbidity associated with pandemic H1N1 influenza. *Cmaj* 182, 131–136.
- 866
- 867 VanderWaal, K. L., Atwill, E. R., Isbell, L. A. & McCowan, B. (2014a). Linking social and  
868 pathogen transmission networks using microbial genetics in giraffe (*Giraffa camelopardalis*). *J.*  
869 *Anim. Ecol.* 83, 406–414.
- 870
- 871 VanderWaal, K. L., Atwill, E. R., Isbell, L. A. & McCowan, B. (2014b). Quantifying microbe  
872 transmission networks for wild and domestic ungulates in Kenya. *Biol. Conserv.* 169, 136–146.
- 873
- 874 Wey, T., Blumstein, D. T., Shen, W. & Jordán, F. (2008). Social network analysis of animal  
875 behaviour: a promising tool for the study of sociality. *Anim. Behav.* 75, 333–344.



876

877 Weiss, M. N., Franks, D. W., Brent, L. J. N., Ellis, S., Silk, M. J., & Croft, D. P. (2021).

878 Common datastream permutations of animal social network data are not appropriate for

879 hypothesis testing using regression models. *Methods. Ecol. Evol.* **12**, 255-265.

880

881 Zinsstag, J., Schelling, E., Waltner-Toews, D. & Tanner, M. (2011). From ‘one medicine’ to

882 ‘one health’ and systemic approaches to health and well-being. *Prev. Vet. Med.* 101, 148–156.
